# Supplementary material for: Living on Two Fronts: Spouse Carers' Experiences of Caring for a Partner with Dementia during COVID-19 in Sweden
Source: Research Square preprint supplement (doi:10.21203/rs.3.rs-8192360/v1), 2026-01-16
Supplement: Supplementary file 1 [file 0506a2093e79b5612aebec13.docx]

**Table 1** Participants’ characteristics

| Age caregiver: Mean (SD)  Female: Mean (SD)  Male: Mean (SD) | 74.7 (5.8)  72.4 (4.0)  80.3 (5.9) |
| --- | --- |
| Age PWD: Mean (SD)  Female: Mean (SD)  Male: Mean (SD) | 54.8 (6.1)  80.7 (6.3)  72.7 (4.9) |
| Years as caregiver: Mean (SD) | 6.0 (2.8) |
| Duration of relationship: Mean (SD) | 45.2 (16.5) |
| Sex caregiver  Female *n* (%)  Male *n (*%) | 17 (71)  7 (29) |
| Sex PWD  Female *n* (%)  Male *n (*%) | 6 (25)  18 (75) |
| Dementia  Alzheimer´s disease *n* (%)  Vascular dementia *n* (%)  Dementia with Lewy Bodies *n* (%)  Others* *n* (%) | 12 (50)  5 (21)  2 (8)  5 (21) |

PWD=person with dementia. *Others included: Frontotemporal (*n*=1), Unspecified (*n*=3), Under evaluation (*n*=1).
