# Supplementary material for: Living on Two Fronts: Spouse Carers' Experiences of Caring for a Partner with Dementia during COVID-19 in Sweden
Source: Research Square preprint supplement (doi:10.21203/rs.3.rs-8192360/v1), 2026-01-16
Supplement: Supplementary file 2 [file 31a3ed3500ef7a9f612b7060.docx]

**Table 2** Themes from the analysis of the spouse carers’ data

| **Themes** |
| --- |
| Contrasting experiences of health |
| Consequences of insufficient support |
| Healthcare as a vector of infection |
| Existential distress of caregiving burden |
| Balancing loneliness with COVID-19-safe socialisation |
